# Supplementary material for: Nanotubes of poly(phenylene vinylene) derivative at the air/water interfaceElectronic supplementary information (ESI) available: Detailed experimental procedures and experimental conditions. See http://www.rsc.org/suppdata/cc/b4/b403870c/
Source: Royal Society of Chemistry journal article supplement (doi:10.1039/b403870c), 2004-01-01
Supplement: b403870c.doc [file b403870c.doc]

Supporting Information for

Nanotubes of Poly (phenylene vinylene) Derivative at the Air/water Interface

**Lin Guo*, Zhongkui Wu, Yingqiu Liang***

*Lab of Mesoscopic Materials Science and State Key Laboratory of Coordination Chemistry, Nanjing University, Nanjing 210093, People’s Republic of China*

[linguo@nju.edu.cn](mailto:linguo@nju.edu.cn) (Lin Guo); [yqliang@nju.edu.cn](mailto:yqliang@nju.edu.cn) (Y. Liang)

*Experimental procedures:* Poly(*2*-methoxy, *5*-(*n*-hexadecyloxy)-*p*-phenylene vinylene) (MH-PPV) has been synthesized and characterized as previously reported.1 The experiments for monolayer spreading were performed on a KSV–5000 Langmuir-Blodgett system (KSV Instruments, Helsinki, Finland) equipped with computer controls. A Wilhelmy plate was used as the surface pressure sensor and situated in the middle of the trough. Two barriers compress or expand symmetrically at the same rate from two side of the trough. A copper net was set on a glass plate, which was placed at the center of the trough bottom, before ultrapure water is poured into the LB trough. Monolayers are obtained by spreading 200 μL chloroform solution composed of MH-PPV with a concentration of 200 μg/mL onto ultrapure water without the adding of acid (pH~6.0). After this, 15 min are allowed for solvent evaporation and then the monolayer is compressed at a typical rate of 20 mm/min. Isotherms of surface pressure versus mean molecular area/repeating unit are measured at 20±0.2℃. The molecular weight per repeating unit of 372.0 g/mol is adopted for all calculations. The subphase water was suck with a syringe at the two sides of the trough keeping liquid level to drop slowly, when the surface pressure is up to the 54 mN/m which is beyond the collapsed pressure (53 mN/m) of MH-PPV monolayer. When the copper nets rise out of the water surface they are picked up carefully and put in desiccator to dry in ambient temperature.

Transmission electron micrograph was then recorded on a JEOL Model JEM-200CX instrument. The AFM was recorded on a Nanoscope atomic force microscope in trapping mode (AFM, Digital Instrumnet Inc.). The Small-angle X-Ray Diffration was measured by using a Rigaku diffractometer at 30 ℃. The X-Ray beam is nickel-filtered Cu Kα=1.54 Å radiation from a sealed tube operated at 30 kV and 70 mA. The nanotubes of MH-PPV were deposited onto a hydrophilic glass plate for these measurements.

External reflection FT-IR spectroscopy of the monolayers at the air/water interface was performed on an Equinox 55 FT-IR spectrometer equipped with a Bruker XA-511 external reflection attachment with a shuttle Langmuir trough using a MCT detector (Bruker Company, Germany). Figure S1 shows the optical setup of XA-511 external reflection attachment. The surface pressure was always monitored during the IRRAS scan. Before spectra measurement, humidity in the sample compartment was held after 4 hrs of the water vapor balance. The temperature was set to 293K. The spectra were recorded with a resolution of 4 cm-1 by coaddition of 2048 scans, and a relative high signal-to-noise ratio could be obtained by carefully controlled the experimental conditions. A reflection angle of 30°was used because at this angle the noise level is relatively low and the absorption’s relatively high. An external reflection spectrum of the clean water surface was used as a reference for the spectra. All IR spectra were used without any smoothing.

# Reference

1. Z. K. Wu, S. X. Wu, Y. Q. Liang, *Langmuir*, 2001, **17,** 7267.


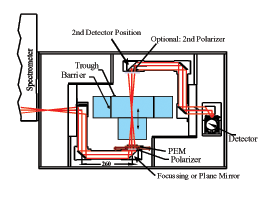


***Figure S1.*** Optical setup of Bruker XA-511 external reflection attachment with a shuttle Langmuir trough.
